# Supplementary material for: Genetic Association Analysis of Paratuberculosis Forms in Holstein-Friesian Cattle
Source: Hindawi journal article supplement (doi:10.1155/2014/321327), 2014-01-01
Supplement: f1 [file 321327.f1.pdf]

SUPPLEMENTARY TABLE 1: Minor allele frequency (MAF) of studied SNPs in *NOD2*, *SLC11A1*, *SP110*, *TLR2*, *TLR4* and *CD209* bovine genes (n=636).

| <b>Gene</b>           | <b>SNP</b>  | <b>Minor Allele</b> | <b>Major Allele</b> | <b>MAF</b> |
|-----------------------|-------------|---------------------|---------------------|------------|
| <b><i>NOD2</i></b>    | rs109601360 | A                   | G                   | 0.2334     |
|                       | rs43710288  | T                   | A                   | 0.4921     |
|                       | rs43710289  | A                   | C                   | 0.4522     |
|                       | rs43710290  | T                   | C                   | 0.1492     |
| <b><i>SLC11A1</i></b> | rs109453173 | G                   | C                   | 0.2055     |
|                       | rs110090506 | T                   | A                   | 0.1627     |
| <b><i>SP110</i></b>   | rs136859213 | T                   | C                   | 0.0700     |
|                       | rs133080973 | G                   | T                   | 0.2537     |
|                       | rs110480812 | G                   | A                   | 0.2887     |
| <b><i>TLR2</i></b>    | rs110491977 | A                   | G                   | 0.1270     |
|                       | rs68268259  | T                   | C                   | 0.1292     |
|                       | rs41830060  | T                   | C                   | 0.1193     |
|                       | rs109971269 | C                   | T                   | 0.1302     |
|                       | rs41830058  | C                   | T                   | 0.1751     |
|                       | rs43706434  | A                   | G                   | 0.1268     |
|                       | rs43706433  | G                   | A                   | 0.2040     |
|                       | rs29017188  | C                   | G                   | 0.4199     |
| <b><i>TLR4</i></b>    | rs43578097  | G                   | A                   | 0.4199     |
|                       | rs43578100  | A                   | G                   | 0.4114     |
|                       | rs208222804 | C                   | T                   | 0.2488     |
| <b><i>CD209</i></b>   | rs209491136 | G                   | A                   | 0.2212     |
|                       | rs211654540 | G                   | A                   | 0.2452     |
|                       | rs208814257 | G                   | C                   | 0.2668     |
|                       | rs210748127 | C                   | T                   | 0.2697     |
